# Supplementary material for: A transient reporter for editing enrichment (TREE) in human cells
Source: PubMed Central journal article supplement (PMC6821290; doi:10.1093/nar/gkz713), 2019-08-20
Supplement: gkz713_supplemental_file.pdf [file gkz713_supplemental_file.pdf]

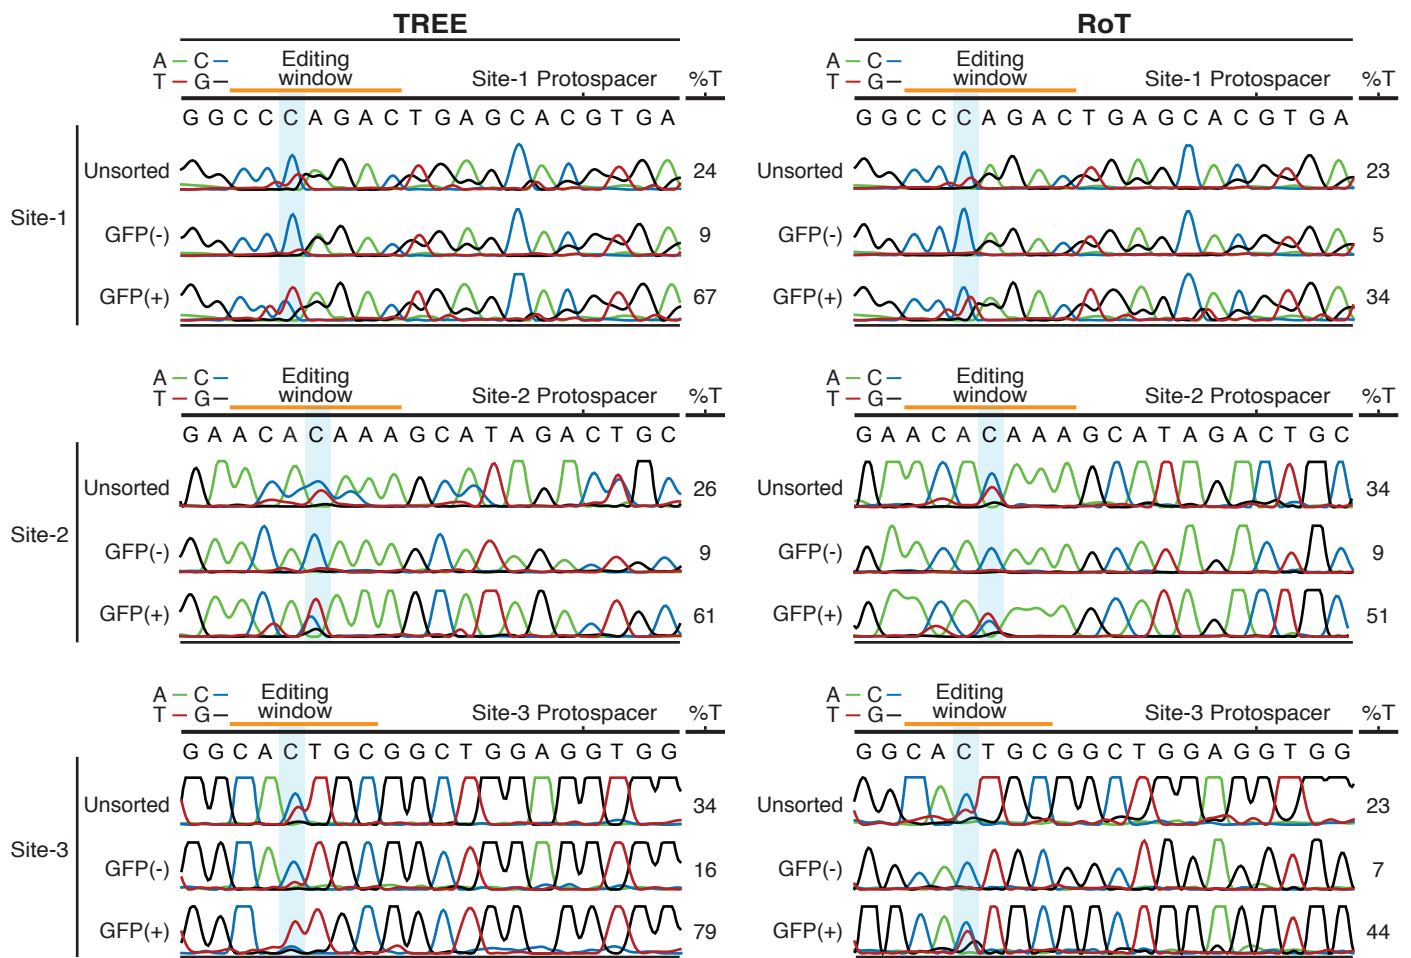

**Supplementary Figure 1. Representative Sanger sequencing chromatographs of edited HEK293 cells enriched using TREE- and RoT-based approaches.** Sanger sequencing chromatographs of Site-1, Site-2, and Site-3 of GFP-positive, GFP-negative, and unsorted cell populations isolated with TREE- and RoT-based approaches.

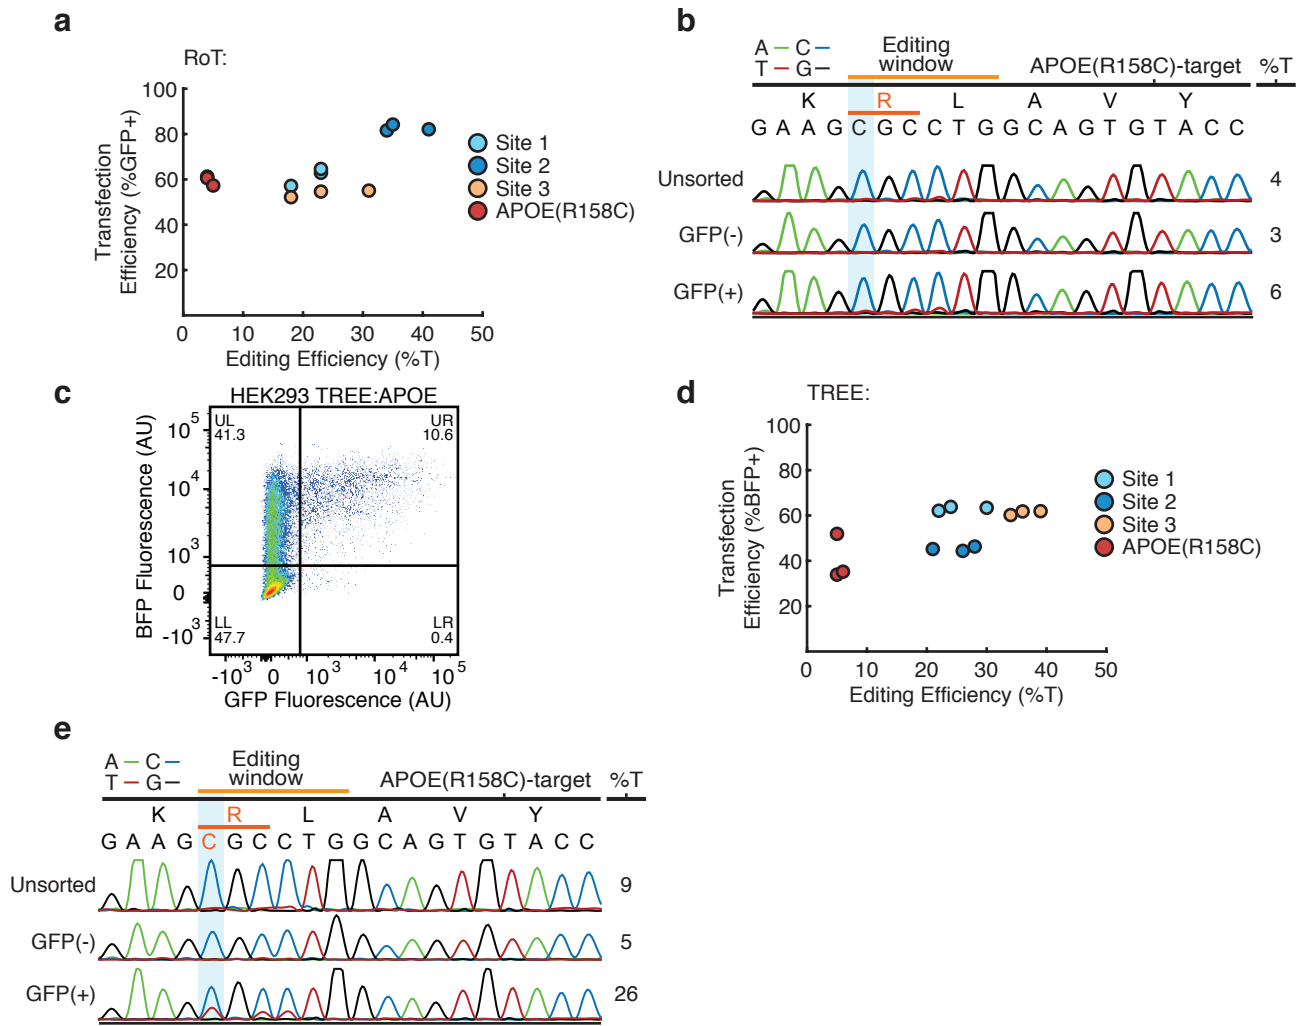

**Supplementary Figure 2. TREE allows for base editing of refractory APOE(R158) locus in HEK293 cells.** (a) HEK293 cells were transfected with pEF-GFP, pCMV-BE4-Gam, and sg(TS). Comparison of transfection efficiency (percentage of GFP-positive cells) and editing efficiency (percentage of C-to-T conversion at target nucleotide) in unsorted cell populations at Site-1, Site-2, Site-2, and APOE(R158) locus. (b) Representative Sanger sequencing chromatographs of APOE(R158) locus in GFP-positive, GFP-negative, and unsorted cell populations isolated with RoT-based methods. (c) Representative flow cytometry plot of HEK293 cells in which TREE was applied targeting the APOE(R158) locus. (d) HEK293 cells were transfected with pEF-BFP, pCMV-BE4-Gam, and pDT-sgRNA. Comparison of transfection efficiency (percentage of BFP-positive cells) and editing efficiency (percentage of C-to-T conversion at target nucleotide) in unsorted cell populations at Site-1, Site-2, Site-3, and APOE(R158) locus. (e) Representative Sanger sequencing chromatographs of APOE(R158) locus in GFP-positive, GFP-negative, and unsorted cell populations isolated with TREE-based methods.

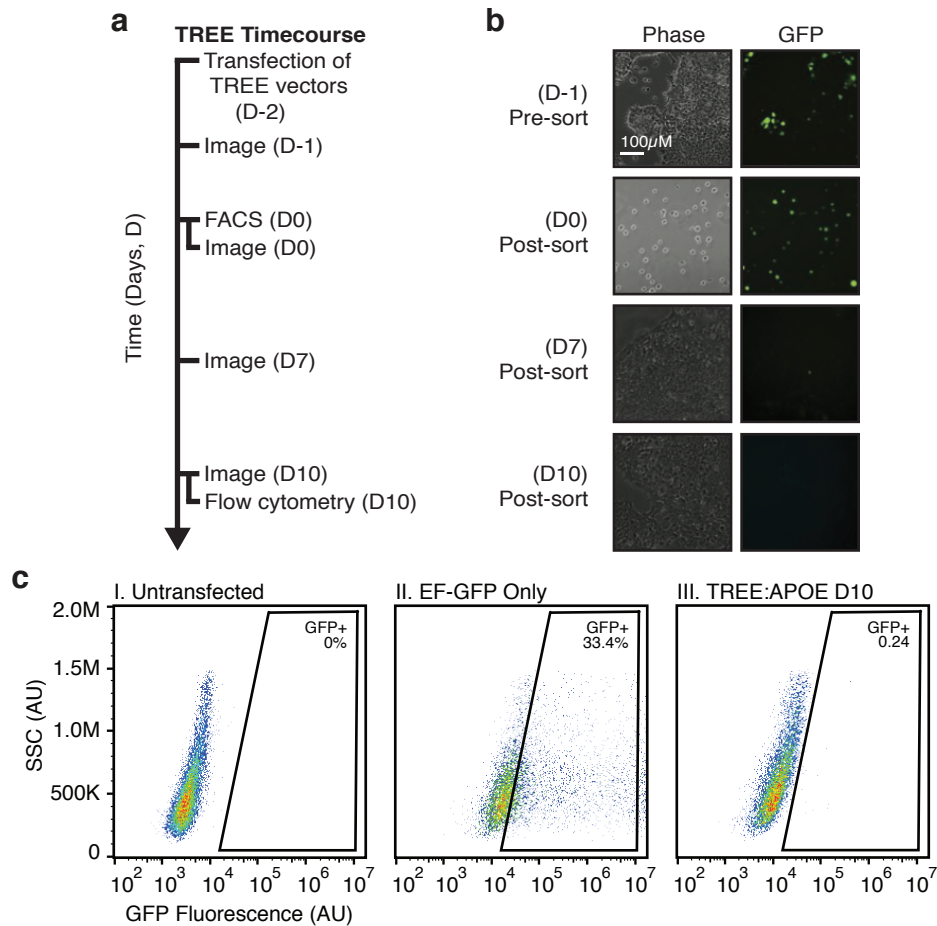

**Supplementary Figure 3. TREE fluorescent output in HEK293 cells is transient.** (a) HEK293 cells were transfected with pEF-BFP, pCMV-BE4-Gam, and pDT-sgRNA and GFP-positive cells were isolated by flow cytometry. Replated GFP-positive cells were analyzed by fluorescent microscopy and flow cytometry at various time points post-sorting. (b) Representative fluorescent microscopy images of cells prior to cell sorting (D-1, Pre-sort) and various time points (D0, D7, D10) after sorting. (c) Representative flow cytometry plots of (i) untransfected HEK293 cells, (ii) pEF-GFP transfected HEK293 cells, and (iii) TREE-enriched GFP-positive HEK293 cells 10 days after sorting.

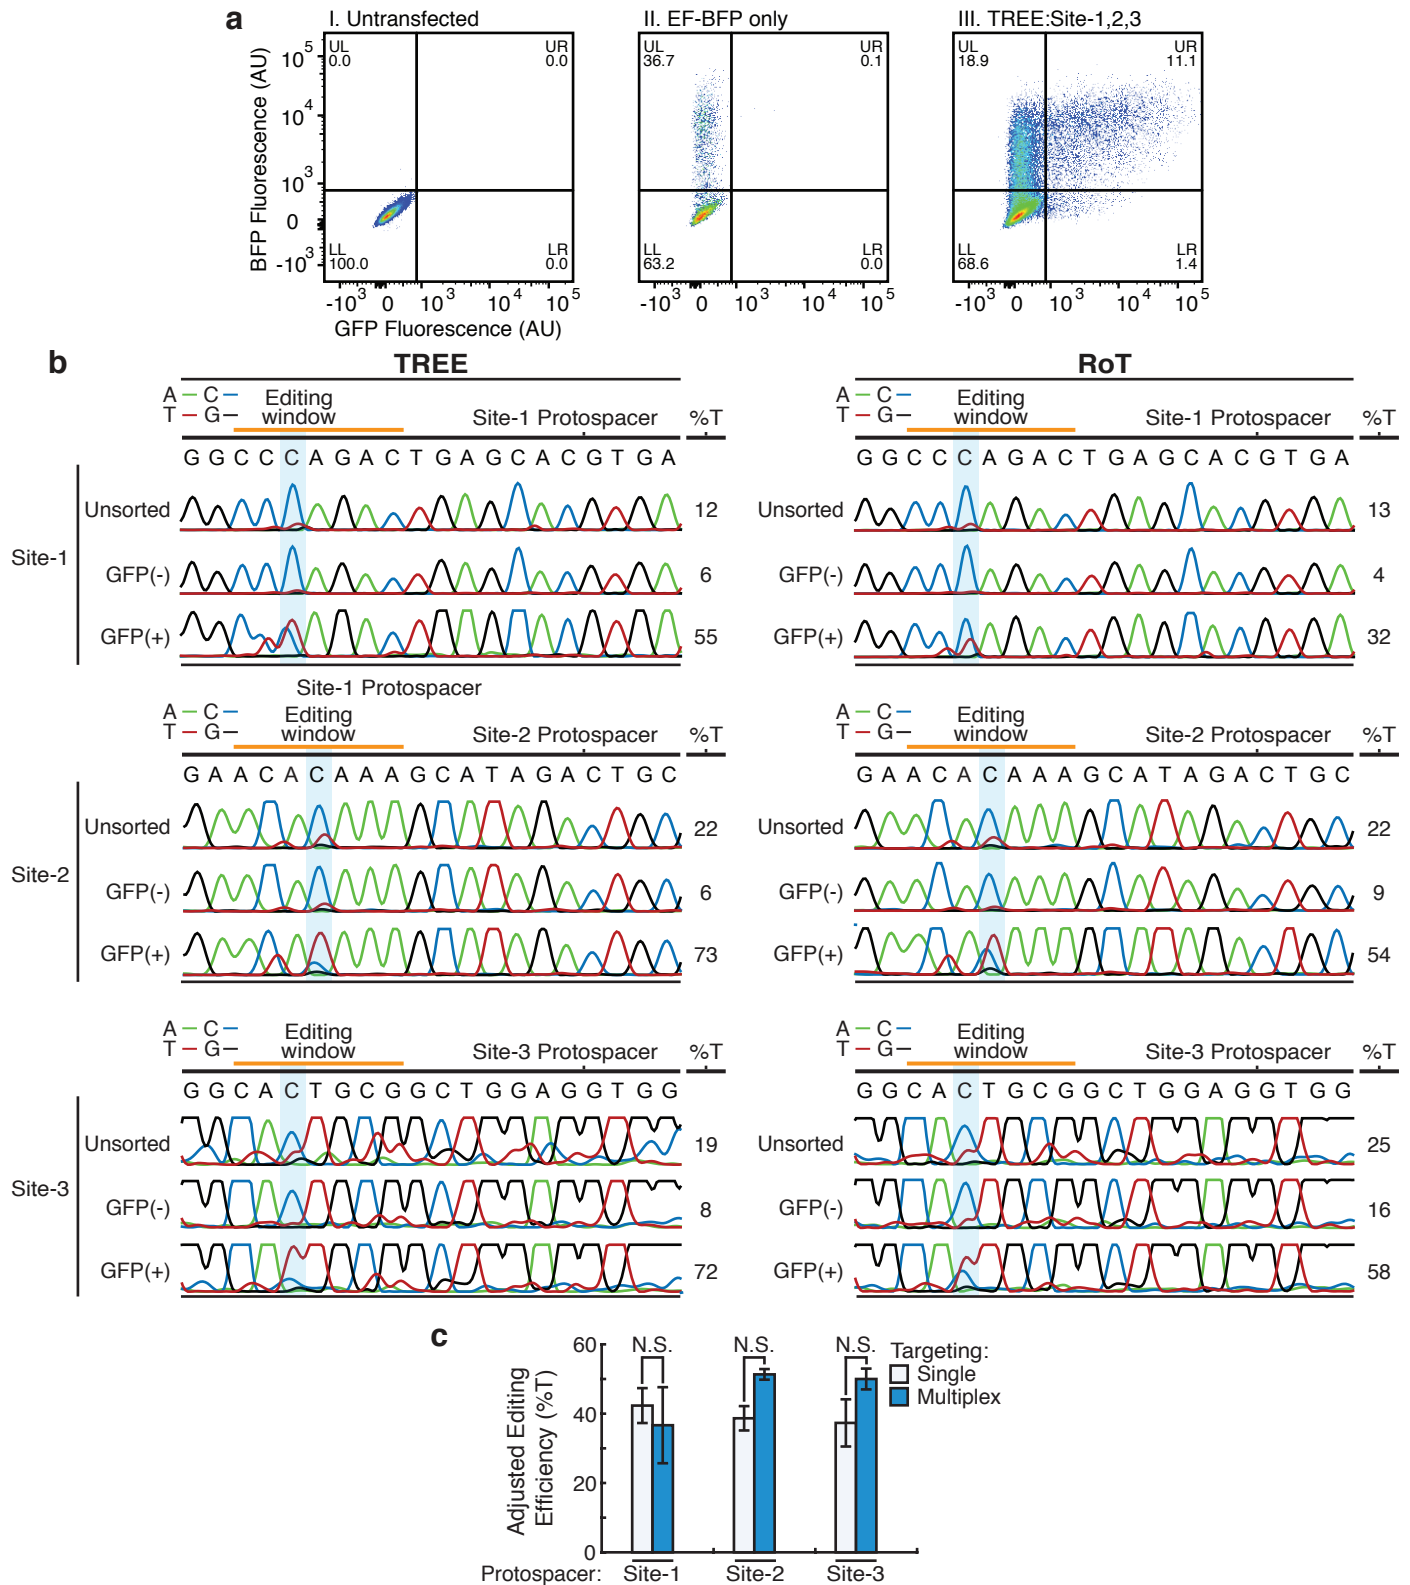

**Supplementary Figure 4. Analysis of multiplexed edited HEK293 cells using TREE- and RoT-based methods.** (a) Representative flow cytometry plot of HEK293 cells in which multiplex TREE was applied simultaneously targeting Site-1, Site-2, and Site-3. (b) Representative Sanger sequencing chromatographs of the Site-1, Site-2, and Site-3 loci in GFP-positive, GFP-negative, and unsorted cell populations isolated with TREE multiplex-based methods. (c) Comparison of base editing efficiencies at Site-1, Site-2, and Site-3 in GFP-positive, GFP-negative, and unsorted cell populations using TREE-based methods to target these sites individually or in a multiplexed manner.  $n=3$ ; N.S. = not significant.

**BG-OT1:** C C C T A C A T C G T G C A G T G C T T  
**Untransfected:** 94 95  
**TREE:** 95 95

**BG-OT2:** C C C C A A G T A G T G C A G T G C T T  
**Untransfected:** 97 90  
**TREE:** 97 94

**BG-OT3:** A A C C A A G A T G T G C A G T G C T T  
**Untransfected:** 95 93  
**TREE:** 91 96

**BG-OT4:** A A C C A G C G C C T G C A G T G C T T  
**Untransfected:** 95 96 96  
**TREE:** 95 97 95

**BG-OT5:** C C C C A T G G C T T G C T G T G C T T  
**Untransfected:** 97 91  
**TREE:** 98 96

**Site1-OT1:** C A C C C A G A C T G A G C A C G T G C  
**Untransfected:** 98 97 98  
**RoT:** 97 98 98  
**TREE:** 98 96 97

**Site1-OT2:** G A C A C A G A C C G G G C A C G T G A  
**Untransfected:** 98 95  
**RoT:** 98 97  
**TREE:** 98 97

**Site1-OT3:** A G C T C A G A C T G A G C A A G T G A  
**Untransfected:** 98 98  
**RoT:** 97 97  
**TREE:** 89 97

**Site1-OT4:** A G A C C A G A C T G A G C A A G A G A  
**Untransfected:** 96 96  
**RoT:** 94 96  
**TREE:** 92 93

**Site1-OT5:** G A G C C A G A A T G A G C A C G T G A  
**Untransfected:** 96 95  
**RoT:** 96 95  
**TREE:** 95 94

**Site2-OT1:** G A A C A C A A T G C A T A G A T T G C  
**Untransfected:** 80 92  
**RoT:** 97 96  
**TREE:** 94 94

**Site2-OT2:** G C A G T C T A T G C T T T A T G T T T  
**Untransfected:** 90  
**RoT:** 88  
**TREE:** 89

Continued on next page.

|                       |   |   |    |   |    |    |   |    |   |   |   |   |   |   |   |   |   |   |   |   |
|-----------------------|---|---|----|---|----|----|---|----|---|---|---|---|---|---|---|---|---|---|---|---|
| <b>Site3-OT1:</b>     | T | G | C  | A | C  | T  | G | C  | G | G | C | C | G | G | A | G | G | A | G | G |
| <b>Untransfected:</b> |   |   | 91 |   | 94 |    |   | 92 |   |   |   |   |   |   |   |   |   |   |   |   |
| <b>RoT:</b>           |   |   | 93 |   | 93 |    |   | 93 |   |   |   |   |   |   |   |   |   |   |   |   |
| <b>TREE:</b>          |   |   | 89 |   | 90 |    |   | 92 |   |   |   |   |   |   |   |   |   |   |   |   |
| <b>Site3-OT2:</b>     | G | G | C  | T | C  | T  | G | C  | G | G | C | T | G | G | A | G | G | G | G | G |
| <b>Untransfected:</b> |   |   | 90 |   | 84 |    |   | 93 |   |   |   |   |   |   |   |   |   |   |   |   |
| <b>RoT:</b>           |   |   | 95 |   | 91 |    |   | 95 |   |   |   |   |   |   |   |   |   |   |   |   |
| <b>TREE:</b>          |   |   | 94 |   | 82 |    |   | 94 |   |   |   |   |   |   |   |   |   |   |   |   |
| <b>Site3-OT3:</b>     | G | G | C  | A | C  | G  | A | C  | G | G | C | T | G | G | A | G | G | T | G | G |
| <b>Untransfected:</b> |   |   | 92 |   | 96 |    |   | 95 |   |   |   |   |   |   |   |   |   |   |   |   |
| <b>RoT:</b>           |   |   | 93 |   | 88 |    |   | 93 |   |   |   |   |   |   |   |   |   |   |   |   |
| <b>TREE:</b>          |   |   | 91 |   | 91 |    |   | 93 |   |   |   |   |   |   |   |   |   |   |   |   |
| <b>Site3-OT4:</b>     | G | G | C  | A | T  | C  | A | C  | G | G | C | T | G | G | A | G | G | T | G | G |
| <b>Untransfected:</b> |   |   | 92 |   |    | 97 |   | 96 |   |   |   |   |   |   |   |   |   |   |   |   |
| <b>RoT:</b>           |   |   | 94 |   |    | 90 |   | 94 |   |   |   |   |   |   |   |   |   |   |   |   |
| <b>TREE:</b>          |   |   | 94 |   |    | 91 |   | 92 |   |   |   |   |   |   |   |   |   |   |   |   |
| <b>Site3-OT4:</b>     | G | G | C  | G | C  | T  | G | C  | G | G | C | G | G | G | A | G | G | T | G | G |
| <b>Untransfected:</b> |   |   | 98 |   | 94 |    |   | 95 |   |   |   |   |   |   |   |   |   |   |   |   |
| <b>RoT:</b>           |   |   | 96 |   | 94 |    |   | 98 |   |   |   |   |   |   |   |   |   |   |   |   |
| <b>TREE:</b>          |   |   | 97 |   | 82 |    |   | 98 |   |   |   |   |   |   |   |   |   |   |   |   |

**Supplementary Figure 5. Analysis of off-target sites in multiplexed edited HEK293 cells using TREE- and RoT-based methods.** GFP-positive cell populations isolated from TREE and RoT approaches were PCR-amplified and subjected to Sanger sequencing on the top predicted off-target loci for the sgRNA sequences for sg(BG) and genomic Sites 1-3. The C nucleotides in red text are potential Cs that can undergo C-to-T conversion within the editing window in the protospacer. The numbers below each C are quantification of the percentage of Cs of the Sanger sequence chromatograms using EditR.

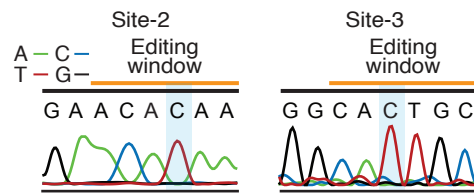

**Supplementary Figure 6. Identification of exclusive targeting events in clonal population in edited HEK293 cells using TREE.** Representative Sanger sequencing chromatographs of clonal cell populations that contain edits exclusively at the target C and not any other Cs within the editing window.

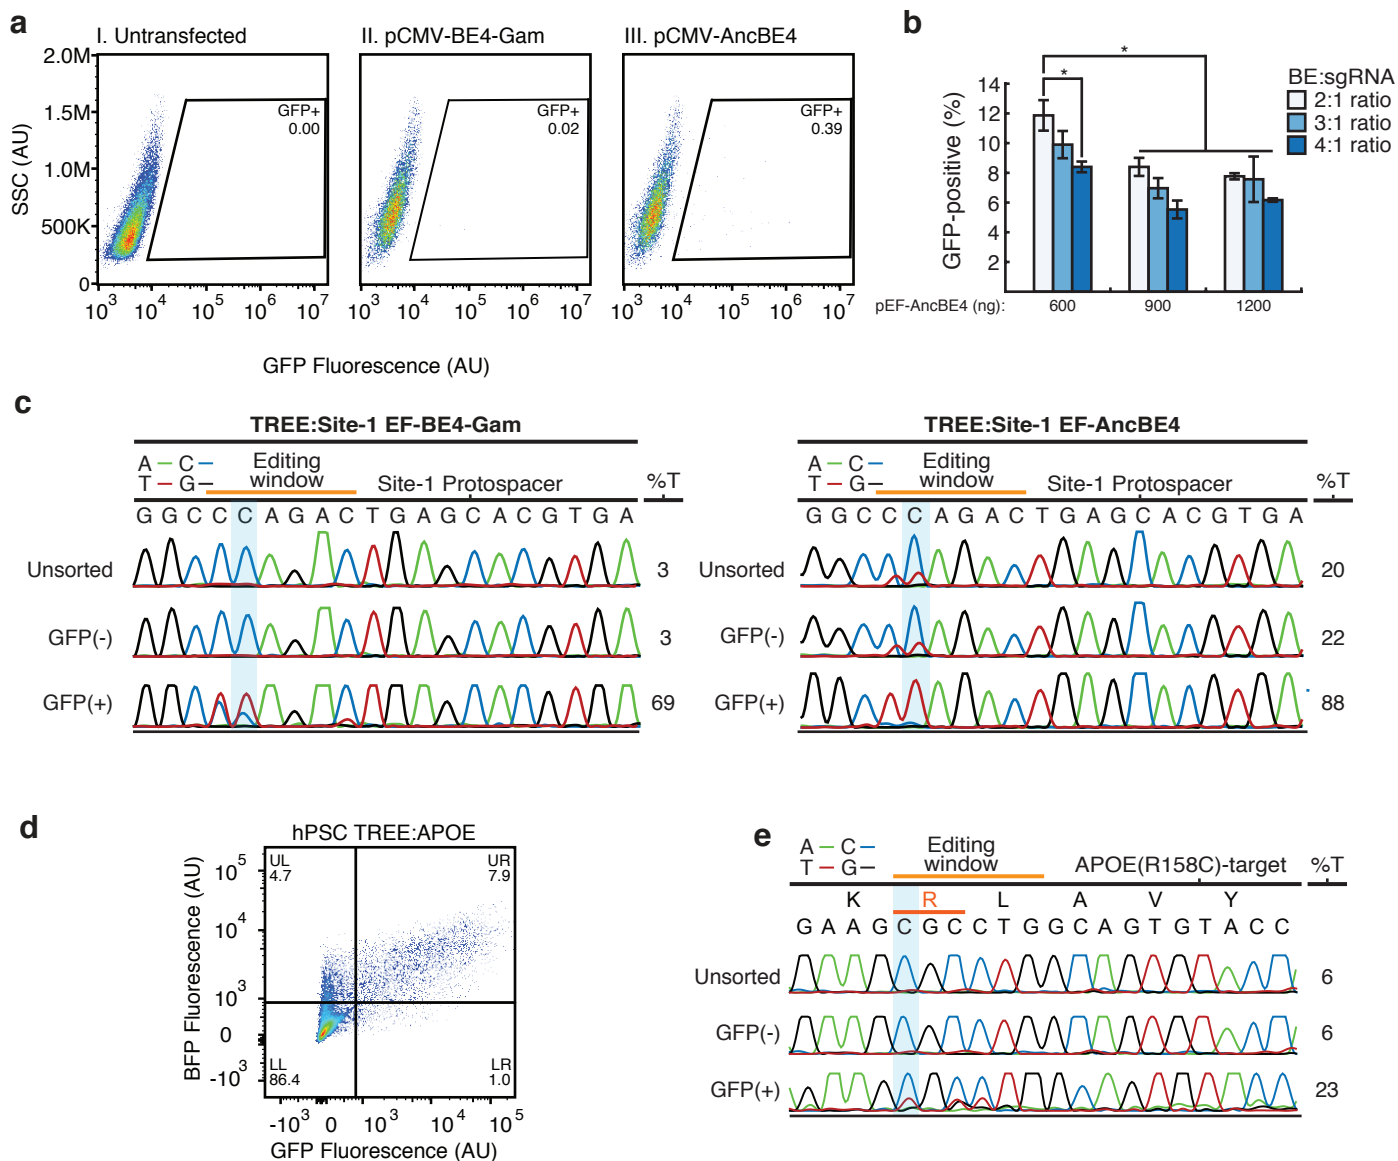

**Supplementary Figure 7. TREE allows for base editing in hPSCs.** (a) Representative flow cytometry plots in which TREE was employed in hPSCs utilizing (i) untransfected (ii) pCMV-BE4-Gam or (iii) pCMV-AncBE4. (b) Editing efficiency (percentage GFP-positive cells) of targeting in hPSCs line with various amounts of pEF-AncBE4 plasmid and ratios with the sg(BG) vector.  $n = 3$ ,  $* = p < 0.05$ . (c) Representative Sanger sequencing chromatographs of Site-1 in GFP-positive, GFP-negative, and unsorted cell populations isolated with TREE- and RoT-based methods in which pEF-BE4-Gam or pEF-AncBE4 was utilized. (d) Representative flow cytometry plot of hPSCs in which TREE was applied targeting the APOE(R158) locus. (e) Representative Sanger sequencing chromatographs of APOE(R158) locus in GFP-positive, GFP-negative, and unsorted cell populations isolated with TREE-based methods.



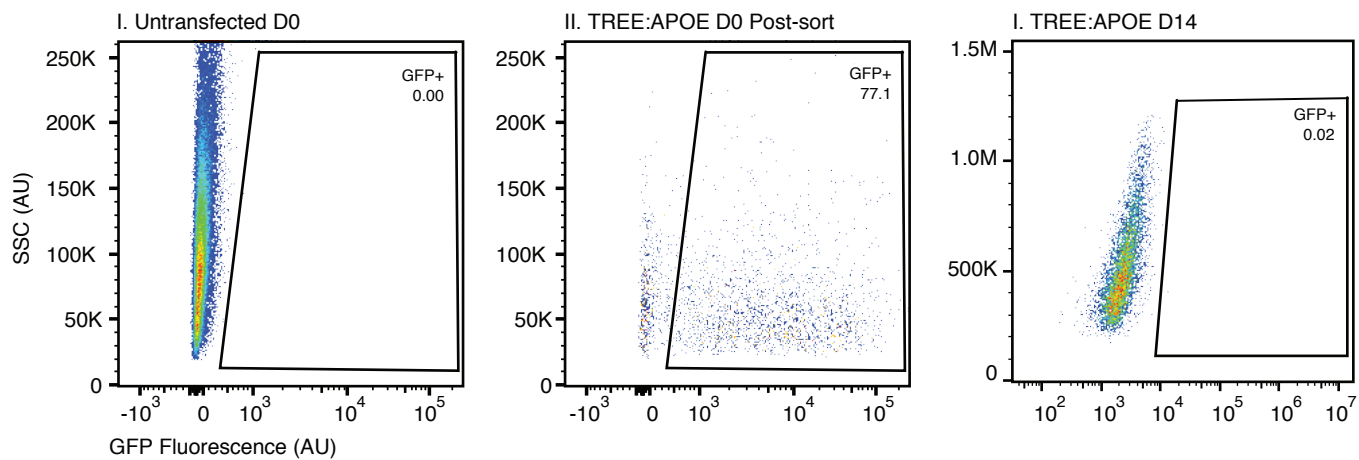

**Supplementary Figure 8. TREE fluorescent output in hPSCs is transient.** Representative flow cytometry plots of (i) untransfected hPSCs, (ii) TREE-enriched GFP-positive hPSCs 0 days (iii) 14 days after sorting.

| a           | Untransfected Site-1    |     |            | TREE:Site-1             |     |            |
|-------------|-------------------------|-----|------------|-------------------------|-----|------------|
|             | Editing window          | PAM | % of Reads | Editing window          | PAM | % of Reads |
| WT          | GGCCCAGACTGAGCACGTGATGG |     | 99.7       | GGCCCAGACTGAGCACGTGATGG |     | 5.2        |
| 18          | GGTCCAGACTGAGCACGTGATGG |     | 0.1        | GGTCCAGACTGAGCACGTGATGG |     | 0.0        |
| 17          | GGCTCAGACTGAGCACGTGATGG |     | 0.1        | GGCTCAGACTGAGCACGTGATGG |     | 0.1        |
| 16          | GGCCTAGACTGAGCACGTGATGG |     | 0.1        | GGCCTAGACTGAGCACGTGATGG |     | 0.3        |
| 12          | GGCCCAGATTGAGCACGTGATGG |     | 0.0        | GGCCCAGATTGAGCACGTGATGG |     | 0.0        |
| 18,17       | GGTTCAGACTGAGCACGTGATGG |     | 0.0        | GGTTCAGACTGAGCACGTGATGG |     | 0.0        |
| 18,16       | GGTCTAGACTGAGCACGTGATGG |     | 0.0        | GGTCTAGACTGAGCACGTGATGG |     | 0.0        |
| 18,12       | GGTCCAGATTGAGCACGTGATGG |     | 0.0        | GGTCCAGATTGAGCACGTGATGG |     | 0.0        |
| 17,16       | GGCTTAGACTGAGCACGTGATGG |     | 0.0        | GGCTTAGACTGAGCACGTGATGG |     | 85.2       |
| 17,12       | GGCTCAGATTGAGCACGTGATGG |     | 0.0        | GGCTCAGATTGAGCACGTGATGG |     | 0.1        |
| 16,12       | GGCCTAGATTGAGCACGTGATGG |     | 0.0        | GGCCTAGATTGAGCACGTGATGG |     | 0.2        |
| 18,17,16    | GGTTTAGACTGAGCACGTGATGG |     | 0.0        | GGTTTAGACTGAGCACGTGATGG |     | 6.2        |
| 17,16,12    | GGCTTAGATTGAGCACGTGATGG |     | 0.0        | GGCTTAGATTGAGCACGTGATGG |     | 2.4        |
| 18,16,12    | GGTCTAGATTGAGCACGTGATGG |     | 0.0        | GGTCTAGATTGAGCACGTGATGG |     | 0.0        |
| 18,17,12    | GGTTCAGATTGAGCACGTGATGG |     | 0.0        | GGTTCAGATTGAGCACGTGATGG |     | 0.0        |
| 18,17,16,12 | GGTTTAGATTGAGCACGTGATGG |     | 0.0        | GGTTTAGATTGAGCACGTGATGG |     | 0.1        |

  

| b        | Untransfected APOE      |     |            | TREE:APOE               |     |            |
|----------|-------------------------|-----|------------|-------------------------|-----|------------|
|          | Editing window          | PAM | % of Reads | Editing window          | PAM | % of Reads |
| WT       | GAAGCGCCTGGCAGTGTACCAGG |     | 93.4       | GAAGCGCCTGGCAGTGTACCAGG |     | 64.2       |
| 16       | GAAGTGCCTGGCAGTGTACCAGG |     | 2.5        | GAAGTGCCTGGCAGTGTACCAGG |     | 5.2        |
| 14       | GAAGCGTCTGGCAGTGTACCAGG |     | 0.1        | GAAGCGTCTGGCAGTGTACCAGG |     | 1.1        |
| 13       | GAAGCGCTTGGCAGTGTACCAGG |     | 0.1        | GAAGCGCTTGGCAGTGTACCAGG |     | 1.0        |
| 16,14    | GAAGTGTCTGGCAGTGTACCAGG |     | 1.1        | GAAGTGTCTGGCAGTGTACCAGG |     | 1.2        |
| 16,13    | GAAGTGCCTGGCAGTGTACCAGG |     | 0.4        | GAAGTGCCTGGCAGTGTACCAGG |     | 1.0        |
| 14,13    | GAAGCGTTTGGCAGTGTACCAGG |     | 0.5        | GAAGCGTTTGGCAGTGTACCAGG |     | 7.0        |
| 16,14,13 | GAAGTGTCTGGCAGTGTACCAGG |     | 1.9        | GAAGTGTCTGGCAGTGTACCAGG |     | 19.2       |

**Supplementary Figure 9. Next generation sequencing (NGS) analysis of allelic outcomes at target sites in hPSCs.** NGS analysis for the target site when TREE was applied to edit Site-1 or the APOE(R158) in hPSCs. The number to left of the allelic outcome indicates the position upstream (5') relative to the PAM. Abbreviation: WT = wild-type unedited locus.

**Supplementary Table 1. List of sgRNA sequences used in this study.**

| <b>Site</b> | <b>Sequence (5'→3')</b> |
|-------------|-------------------------|
| Site-1      | GGCCCAGACTGAGCACGTGA    |
| Site-2      | GAACACAAAGCATAGACTGC    |
| Site-3      | GGCACTGCGGCTGGAGGTGG    |
| APOE(R158)  | GAAGCGCCTGGCAGTGTACC    |
| BFP(H66Y)   | GACCCACGGCGTGCAGTGCTT   |
| C1ORF228    | GTGCTGTTAGCACCCCTGGAAA  |

**Supplementary Table 2. List of primers used in this study to amplify on-target sites.**

| <b>Primer</b> | <b>Forward Sequence (5'→3')</b> | <b>Reverse Sequence (5'→3')</b> |
|---------------|---------------------------------|---------------------------------|
| Site-1        | ATGTGGGCTGCCTAGAAAGG            | CCCAGCCAAACTTGTC AACC           |
| Site-2        | CCAGCCCCATCTGTCAA ACT           | TGAATGGATT CCTTGGAACAATGA       |
| Site-3        | TGGTCTTCTTTCCCCTCCCCTGCCCTCC    | GGCCTGGAGGCGGGGGCTCAGAGA        |
| APOE(R158)    | GGACGAGACCATGAAGGAGTTGAAGGC     | CCACCTGCTCCTTCACCTCGTCCAG       |

**Supplementary Table 3. Parameters for EditR analysis.**

| <b>Target Site</b> | <b>Sequencing Direction</b> | <b>Protospacer</b>   | <b>5' bound</b>     | <b>3' bound</b>    |
|--------------------|-----------------------------|----------------------|---------------------|--------------------|
| Site-1             | Forward                     | GGCCCAGACTGAGCACGTGA | GGCCTGGGTCAA        | TTCCTTTCCTCTG      |
|                    | Reverse                     | TCACGTGCTCAGTCTGGGCC | GAGGAAAGGAAGCCCTGCT | CAGGCCAGGGCTGGA    |
| Site-2             | Forward                     | GAACACAAAGCATAGACTGC | CCCGCTGGCCCTGT      | TCAGGCTGGCCCGC     |
|                    | Reverse                     | GCAGTCTATGCTTTGTGTTC | CCAGCCCGCTGGCCCTGTA | AGCTATTCAGGCT      |
| Site-3             | Forward                     | GTGGCACTGCGGCTGGAGGT | GATGACAGGCAGGGGCA   | CAGCACCAGA         |
|                    | Reverse                     | ACCTCCAGCCGCAGTGCC   | CCGCGGTGCCCTGCCT    | AAGCGGAGACTCTGGTGC |
| APOE(R158)         | Forward                     | GAAGCGCCTGGCAGTGTACC | CTGCGCAAGCTGCG      | TCGGCGCCCTCGCG     |
|                    | Reverse                     | GGTACACTGCCAGGCGCTTC | GGATGGCGCTGA        | GCCTCGCCTCCCACC    |

**Supplementary Table 4. PCR conditions for each target site analyzed by Sanger sequencing.**

| Target     | Initial denature time and temperature | Denature time and temperature | Annealing time and temperature | Extension time and temperature | Final extension time and temperature |
|------------|---------------------------------------|-------------------------------|--------------------------------|--------------------------------|--------------------------------------|
|            |                                       | 40 cycles                     |                                |                                |                                      |
| Site-1     | 98°C, 45 seconds                      | 98°C, 10 seconds              | 54°C, 5 seconds                | 72°C , 20 seconds              | 72°C, 10 minutes                     |
| Site-2     | 98°C, 45 seconds                      | 98 °C, 10 seconds             | 56°C, 5 seconds                | 72°C , 20 seconds              | 72°C, 10 minutes                     |
| Site-3     | 98°C, 45 seconds                      | 98°C, 10 seconds              | 56°C, 5 seconds                | 72°C , 20 seconds              | 72°C, 10 minutes                     |
| APOE(R158) | 98°C, 45 seconds                      | 98°C, 10 seconds              | 62°C, 5 seconds                | 72°C , 20 seconds              | 72°C, 10 minutes                     |

**Supplementary Table 5. List of primers used in this study to amplify off-target sites. Abbreviations: BG-OT = Off-targets associated with sg(BG), Site1-OT = Off-targets associated with sg(Site-1), Site2-OT = Off-targets associated with sg(Site-2), Site3-OT = Off-targets associated with Sg(Site-3).**

| <b>Primer</b> | <b>Forward Sequence (5'→3')</b> | <b>Reverse Sequence (5'→3')</b> |
|---------------|---------------------------------|---------------------------------|
| BG-OT1        | GATGCGCTTCCGGAAGACC             | GCTTCTTGAGCTTCTCAGCG            |
| BG-OT2        | GGTAGCATG TTCAGGCACCAG          | CATCCCTAGTACCGAATCCCATATAGC     |
| BG-OT3        | CATCCTCCCACCTAAGCCTTTCAA        | TTGAGTTAATAGCATTATAACAATTTCCACA |
| BG-OT4        | ACTCCTTACAACCGGAAGGCAAAC        | TGGACGTGGTGAAGCCCGTGGTG         |
| BG-OT5        | TAGGTCTCTAGGGGGCCTCTG           | AGGCTGCCCAACAGCCCCACT           |
| Site1-OT1     | TCCCCTGTTGACCTGGAGAA            | CACTGTACTTGCCCTGACCA            |
| Site1-OT2     | TGAGATGTGGGCAGAAGGG             | TTGGTGTGACAGGGAGCAA             |
| Site1-OT3     | GTCCAAAGGCCCAAGAACCT            | TGAGAGGGAACAGAAGGGCT            |
| Site1-OT4     | GCTCATCTTAATCTGCTCAGCC          | TCCTAGCACTTTGGAAGGTCG           |
| Site1-OT5     | AAAGGAGCAGCTCTTCCTGG            | GTCTGCACCATCTCCACAA             |
| Site2-OT1     | GTGTGGAGAGTGAGTAAGCCA           | ACGGTAGGATGATTT CAGGCA          |
| Site2-OT2     | TTTTTTGGTACTCGAGTGTTATTCAG      | CACAAAGCAGTGTAGCTCAGG           |
| Site3-OT1     | GGCATGGCTTCTGAGACTCA            | CCCCTTGCACTCCCTGTCTTT           |
| Site3-OT2     | GAAGAGGCTGCCCATGAGAG            | TTTGGCAATGGAGGCATTGG            |
| Site3-OT3     | GGTCTGAGGCTCGAATCCTG            | CTGTGGCCTCCATATCCCTG            |
| Site3-OT4     | TTCCACCAGAACTCAGCCC             | CCTCGGTTCTCCACAACAC             |
| Site3-OT5     | GCAGGGGAGGGATAAAGCAG            | CACGGGAAGGACAGGAGAAG            |

**Supplementary Table 6. List of primers used in this study for NGS analysis.**

| <b>Primer</b> | <b>Forward Sequence (5'→3')</b> | <b>Reverse Sequence (5'→3')</b> |
|---------------|---------------------------------|---------------------------------|
| Site-1        | ATGTGGGCTGCCTAGAAAGG            | CCCAGCCAAACTTGTCAACC            |
| APOE(R158)    | GGACGAGACCATGAAGGAGTTGAAGGC     | CCACCTGCTCCTTCACCTCGTCCAG       |



**Supplementary Table 7. PCR conditions for each target site subjected to NGS analysis.**

| Target     | Initial denature time and temperature | Denature time and temperature | Annealing time and temperature | Extension time and temperature | Final extension time and temperature |
|------------|---------------------------------------|-------------------------------|--------------------------------|--------------------------------|--------------------------------------|
|            |                                       | 40 cycles                     |                                |                                |                                      |
| Site-1     | 98°C, 45 seconds                      | 98°C, 10 seconds              | 54°C, 5 seconds                | 72°C, 20 seconds               | 72°C, 10 minutes                     |
| APOE(R158) | 98°C, 45 seconds                      | 98°C, 10 seconds              | 62°C, 5 seconds                | 72°C, 20 seconds               | 72°C, 10 minutes                     |

**Supplementary Table 8. Comparison of editing efficiency using RoT-based approaches at the same target loci in this manuscript, Komar et al., and Koblan et al.**

|                       | Figure 3E Standage-Beier et al. |           |           | Figure 5C Komar et. al Sci Adv. 2017 Aug 30;3(8) |           |           | Figure 1C Koblan et. al Nat Biotechnol. 2018 Oct;36(9):843-846 |           |           |
|-----------------------|---------------------------------|-----------|-----------|--------------------------------------------------|-----------|-----------|----------------------------------------------------------------|-----------|-----------|
|                       | Reporter of Transfection        |           |           | No Reporter                                      |           |           | Reporter of Transfection                                       |           |           |
|                       | Unsorted                        | Reporter- | Reporter+ | Unsorted                                         | Reporter- | Reporter+ | Unsorted                                                       | Reporter- | Reporter+ |
| <b>Site-1 (HEK 3)</b> | 21.3±2.9                        | 3.3±2.8   | 40.7±7.0  | ~45                                              | N/A       | N/A       | ~38                                                            | N/A       | ~55       |
| <b>Site-2 (HEK 2)</b> | 36.6±3.8                        | 13.3±5.9  | 49.7±5.1  | ~35                                              | N/A       | N/A       | ~20                                                            | N/A       | ~38       |
| <b>Site-3 (HEK 4)</b> | 24.0±6.6                        | 7.6±5.0   | 45.3±1.5  | ~45                                              | N/A       | N/A       | ~25                                                            | N/A       | ~40       |
